1 **Environmental stress determines the colonization and impact of an endophytic fungus**  
2 **on invasive knotweed**

3

4 Sigisfredo Garnica<sup>1</sup>, Zhiyong Liao<sup>2,3</sup>, Samuel Hamard<sup>2,4</sup>, Frank Waller<sup>5</sup>, Madalin Parepa<sup>2</sup>,  
5 Oliver Bossdorf<sup>2</sup>

6

7 <sup>1</sup> Instituto de Bioquímica y Microbiología, Facultad de Ciencias, Universidad Austral de  
8 Chile, Valdivia, Chile

9 <sup>2</sup> Plant Evolutionary Ecology, Institute of Evolution & Ecology, University of Tübingen,  
10 Germany

11 <sup>3</sup> CAS Key Laboratory of Tropical Forest Ecology, Xishuangbanna Tropical Botanical  
12 Garden, Chinese Academy of Sciences, Mengla, China

13 <sup>4</sup> Laboratoire Ecologie Fonctionnelle et Environnement, Université de Toulouse, France

14 <sup>5</sup> Pharmaceutical Biology, Julius Sachs Institute for Biosciences, University of Würzburg,  
15 Germany

16

17 Correspondence: Oliver Bossdorf, Tel. +49 7071 29 78809, [oliver.bossdorf@uni-tuebingen.de](mailto:oliver.bossdorf@uni-tuebingen.de)

18

19 **Abstract**

- 20 1. There is increasing evidence that microbes play a key role in some plant invasions. A  
21 diverse and widespread but little understood group of plant-associated microbes are the  
22 fungal root endophytes of the order Sebaciales. They are associated with exotic  
23 populations of invasive knotweed (*Reynoutria* ssp.) in Europe, but their effects on the  
24 invaders are unknown.
- 25 2. We used the recently isolated Sebaciales root endophyte *Serendipita herbamans* to  
26 experimentally inoculate invasive knotweed and study root colonisation and effects on  
27 knotweed growth under different environmental conditions. We verified the inoculation  
28 success and fungal colonisation through immunofluorescence microscopy and qPCR.
- 29 3. We found that *S. herbamans* strongly colonized invasive knotweed in low-nutrient and  
30 shade environments, but much less under drought or benign conditions. At low nutrients,  
31 the endophyte had a positive effect on plant growth, whereas the opposite was true under  
32 shaded conditions.
- 33 4. *Synthesis*. Our study demonstrates that the root endophyte *S. herbamans* has the potential  
34 to colonize invasive knotweed fine roots and impact its growth, and it could thus also play  
35 a role in natural populations. Our results also show that effects of fungal endophytes on  
36 plants can be strongly environment-dependent, and may only be visible under stressful  
37 environmental conditions.

38

39 **Key words**

40 Biological invasions, drought, fungal endophytes, Japanese knotweed, nutrient availability,  
41 plant-microbe interactions, *Reynoutria japonica*, Sebaciales, shading, stress tolerance

42

### 43 **Introduction**

44 Fungal endophytes are a phylogenetically diverse and widespread group of plant-associated  
45 microbes (Rodriguez et al., 2009). They can influence the growth and reproduction of  
46 individual plants, or their resistance to abiotic stress or natural enemies (Cosme et al., 2016;  
47 Kivlin et al., 2013; Mayerhofer et al., 2013; Oberhofer et al., 2014; Rho et al., 2018;  
48 Rodriguez et al., 2008). Some of the positive effects are related to the ability of endophytes to  
49 improve the nutrition of their host plants (Behie & Bidochka, 2014). There is also evidence  
50 that endophytes can influence the diversity and composition of entire plant communities  
51 (Afkhani & Strauss, 2016; Aguilar-Trigueros & Rillig, 2016; Clay & Holah, 1999; Rudgers  
52 et al., 2004; Rudgers et al., 2005) as well as their associated ecological networks (e.g.  
53 herbivores and their parasitoids; Omacini et al., 2001). However, so far our understanding of  
54 fungal endophytes is based on experiments with very few taxa, in particular the genus  
55 *Neotyphodium* and its asexual stage *Epichloë*: Other fungal systems have been hardly studied,  
56 mainly because most fungal endophytes are often difficult to cultivate and thus controlled  
57 experiments for testing their ecological functions have so far been impossible.

58 An important group of fungal endophytes for which this has long been true is the  
59 Serendipitaceae family in the order of Sebaciales that contains many species with broad  
60 geographic and host ranges (Garnica et al., 2016; Weiss et al., 2011). Previous experimental  
61 work has so far been largely restricted to *Serendipita indica* (*Piriformospora indica*), and it  
62 showed that *P. indica* stimulates plant growth and influences plant nutrition and tolerances to  
63 biotic and abiotic stresses (Achatz et al., 2010; Barazani et al., 2005; Gill et al., 2016; Waller  
64 et al., 2005). Our group in Tübingen recently isolated and cultivated another widespread  
65 Serendipitaceae species, *Serendipita herbamans*, which is abundant and associated with a  
66 broad range of host species and habitats in Central Europe (Riess et al., 2014).

67           Soil microbes can influence plant growth and stress tolerance, and these effects are to  
68   some extent host plant-specific. As a consequence, plant-microbe interactions play a role in  
69   structuring plant communities, and there is increasing evidence that they are also important in  
70   the invasion of exotic plant species (Callaway et al., 2004; Dawson & Schrama, 2016; Inderjit  
71   & van der Putten, 2010; Klironomos, 2002). In general, plant-associated microbes may have  
72   positive or negative feedbacks on plants (Bever et al., 2012; van der Putten et al., 2013). If  
73   exotic plants accumulate biota with overall more positive effects, maybe because some of the  
74   their native pathogens did not make it to the introduced range, this may give invaders an  
75   advantage over native plants (Callaway et al., 2011; Maron et al., 2014; Mitchell & Power,  
76   2003; Reinhart et al., 2003). Alternatively, exotic plants may influence soil biota to the  
77   detriment of the native plants, e.g. through increasing abundances of their pathogens (Mangla  
78   & Callaway, 2007) or disrupting interactions with mutualists (Meinhardt & Gehring, 2012;  
79   Stinson et al., 2006).

80           Most previous research on plant-microbe interactions and plant invasion has focused on  
81   soil-borne microbes rather than endophytes, even though fungal endophytes are clearly  
82   abundant and diverse also in invasive plant populations (Clay et al., 2016; Shipunov et al.,  
83   2008). Besides an interesting series of studies by Aschehoug et al. (2012, 2014) who  
84   demonstrated that the leaf endophyte *Alternaria alternata* makes invasive knapweed  
85   (*Centaurea stoebe*) more competitive and allelopathic against native North American grasses,  
86   there has so far been little experimental work on fungal endophytes and invasive plants.

87           One of the most problematic plant invaders of temperate Europe and North America is  
88   the Japanese knotweed (*Reynoutria japonica*) and its hybrid *R. × bohemica*. Their aggressive  
89   growth can damage buildings and other structures, and it has huge impacts on native plant  
90   communities and ecosystems (Aguilera et al., 2010; Gerber et al., 2008; Hejda et al., 2009).  
91   Because of these ecological and economic costs, there is great interest in controlling invasive

92 knotweed, and in understanding the biological mechanisms contributing to its success.  
93 Previous experimental research indicates that chemical or microbial processes belowground,  
94 or their interplay, may contribute to knotweed invasion success (Murrell et al., 2011; Parepa  
95 et al., 2013; Siemsen & Blossey, 2007). However, the precise mechanisms and in particular  
96 microbial taxa involved in these phenomena are unknown.

97 In a preliminary screening of some invasive knotweed populations around Tübingen  
98 (see Supplementary Information) we had found a large diversity of root-associated fungi, and  
99 40% of the studied fine-root samples also harboured ITS sequences of Sebaciales fungi,  
100 including *S. herbamans* (Table S1). Thus, interactions between invasive knotweed and  
101 Sebaciales appeared to be common, and we were curious about the nature of the interaction  
102 between the two taxa, in particular whether these hidden and little understood, but very  
103 common, fungi influenced the growth and performance of invasive knotweed. We suspected  
104 that if *S. herbamans* had an effect on knotweed, it would depend on environmental conditions,  
105 in particular the resource supply of the plants. We tested this through a greenhouse  
106 experiment in which we inoculated Japanese knotweed and its hybrid with *S. herbamans*  
107 under benign as well as drought, shading and low-nutrient conditions. To confirm inoculation  
108 success and quantify fungal colonization, we used immunofluorescence microscopy and  
109 qPCR. Specifically, we asked the following questions: (1) Does colonization of knotweed by  
110 *S. herbamans* depend on environmental conditions? (2) What effects does the endophyte have  
111 on the growth and performance of knotweed, and (3) to what extent are these effects  
112 environment-dependent?

113

## 114 **Material and Methods**

### 115 *Plant material*

116 *Reynoutria japonica* and its hybrid *Reynoutria* × *bohemica* are large perennial forbs from the  
117 Polygonaceae family that have become invasive in riparian and ruderal habitats in the  
118 temperate regions of Europe and North America. They are clonal plants with extensive  
119 rhizome networks, and in their invasive range they often form dense monoclonal stands and  
120 become extremely dominant (Aguilera et al., 2010). In our experiment, we used plant material  
121 from a live collection of knotweed clones that had originally been collected across seven  
122 regions in Switzerland and Germany (Krebs et al., 2010) and that had been cultivated in a  
123 common garden for several years. We used rhizome cuttings from 20 *R. japonica* clones and  
124 13 *R. × bohemica* clones, with approximately ten rhizome fragments, each containing two  
125 nodes and thus one intact internode, from each clone. After removal of all fine roots, the  
126 rhizome fragments were surface-sterilized using the method described by (Huang et al.,  
127 2014).

128

#### 129 *Endophyte material*

130 We worked with the endophyte *Serendipita herbamans* (DSM 27534), a member of the order  
131 Sebaciales, whose discovery and isolation was described in (Riess et al., 2014). Prior to the  
132 experiment, we grew the endophyte for 14 days in Petri dishes with MEA medium containing  
133 2% malt extract and 1.5% agar at 20°C in the dark. We then used 5 mm plugs from these  
134 plates, containing media and mycelia, to inoculate 0.5 L Erlenmeyer flasks with 250 ml malt  
135 extract (2.0%) liquid medium. The inoculated flasks were incubated in the dark on a rotary  
136 shaker (47-52 rpm) at 20°C. After two weeks of incubation, the resulting mycelium was  
137 separated from the media and washed five times with sterile distilled water.

138

#### 139 *Experimental set-up*

140 We set up a greenhouse experiment in which we tested the effects of endophyte inoculation  
141 on knotweed growth in four different environments: control, drought, low nutrients and shade.  
142 Except for the control environment, all conditions were expected to be stressful for the plants.  
143 We planted individual rhizome fragments 3 cm deep in 1.5 L pots filled with a 1:3 mixture of  
144 low-nutrient field soil and sand (Sand- und Kieswerk Bischoff, Rottenburg, Germany). Prior  
145 to planting, we measured the length and diameter of each rhizome fragment. All pots were  
146 placed on individual saucers and watered as needed. After two weeks, when all aboveground  
147 shoots had appeared, we inoculated half of the pots with 0.5 g of fresh *S. herbamans*  
148 mycelium which were applied in small pits close to the center of the rhizomes (Fig. 1A). For  
149 non-inoculated plants we also created the same pits and applied a similar volume of distilled  
150 water. Another two weeks after the inoculation, we started the environmental treatments. In  
151 the shade treatment, the plants were covered individually with shading mesh bags that  
152 reduced light levels to approximately 20%. The low-nutrient plants did not receive any  
153 fertilizer throughout the experiment, whereas all others received 7:3:6 N:P:K fertilizer (b1  
154 Universal-Flüssigdünger, toom Baumarkt GmbH) equivalent to 150 kg N/ha distributed  
155 across 15 applications at seven-day intervals during the stress treatments. The drought plants  
156 generally received only a third of the regular watering amount and, in contrast to all other  
157 plants, regularly showed signs of wilting (loss of turgor). A total of 288 plants (160 *R.*  
158 *japonica* and 128 *R. x bohemica*) were randomly assigned to the eight treatment combinations  
159 (four environmental conditions, with or without endophytes), with approximately equal  
160 representation of the two taxa in each treatment. Throughout the experiment, the plants were  
161 grown in a climate-controlled greenhouse, in a completely randomized order, with  
162 supplemental lighting at a 14:10 h light:dark cycle at 20°C/18°C.

163

164 *Data collection*

165 15 weeks after the start of the treatments, we measured leaf chlorophyll content on four leaves  
166 per plant using a handheld chlorophyll meter (SPAD 502Plus, Konica Minolta, Osaka, Japan).  
167 We then removed all leaves from the stem, measured their area with a LI-3100C leaf area  
168 meter (LI-COR Environmental, Lincoln, Nebraska, USA) and dried the leaves and stems of  
169 each plant separately at 80°C for 3 days. We used the leaf area and leaf dry mass to calculate  
170 the specific leaf area (SLA) of each plant, and we combined the leaf and stem dry mass to  
171 total aboveground biomass. Finally, we carefully washed the roots of each plant and took 10  
172 fine root samples from different parts of the root system that we mixed and immediately  
173 stored at -20°C for subsequent DNA extraction, or placed in fixing solution (0.15% (wt/vol)  
174 trichloroacetic acid in 4:1 (vol/vol) ethanol/chloroform) for microscopy.

175

#### 176 *Assessment of endophyte colonization*

177 We assessed the fungal colonization of knotweed roots qualitatively through fluorescence  
178 microscopy and quantitatively through qPCR. Both analyses were done for randomly selected  
179 subsets of the plants. For the microscopy, we collected roots from three pots of each treatment  
180 by species combination, including both inoculated and non-inoculated samples (altogether 16  
181 x 3 = 48 samples). The root samples were stained with Wheat Germ Agglutinin-Alexa Fluor  
182 488 (WGA488; Thermo Fisher, Waltham MA, USA), which specifically stains fungal cell  
183 walls. The staining procedure was as described in (Deshmukh et al., 2006), and the images  
184 were recorded on a Leica TCS SP5 2 confocal microscope using the bright field channel and a  
185 GFP filter set for detection of WGA488.

186 For the qPCR, we analysed 10 plants from each treatment by species combination, i.e. a  
187 total of 80 plants, with three replicates of non-inoculated plants and seven replicates for  
188 inoculated plants. We ground fine roots to a fine powder in liquid nitrogen using a sterile  
189 mortar and pestle, and we used 500 mg of this material to isolate DNA using the DNAeasy



190 Plant Mini Kit (Qiagen, Hilden, Germany). The relative amounts of *S. herbamans* DNA in the  
191 samples were determined through qPCR reactions with a *S. herbamans*-specific and a  
192 *Reynoutria*-specific primer pair. The *S. herbamans*-specific primer pair SerhaITS binds to the  
193 ITS region of the 5.8 S rDNA sequence of *S. herbamans* (SerhaITSfw199: 5'-  
194 AGCCTTGTGCGGTAAAGCGA-3', SerhaITSrev199: 5'-  
195 TGTATTCCGGCACCTTAACCTC-3'). The *Reynoutria*-specific primer pair FallCHS binds  
196 to the genomic DNA of the Chalcone synthase gene EF090266.2 of *Fallopia japonica* (now  
197 *Reynoutria japonica*) (FallCHSfwd: 5'-GGAGATGCGTGTATATTCTT-3', FallCHSrev: 5'-  
198 CCAAAGATGAAGCCATGTAG-3'). The PCR primers were designed using Primer-BLAST  
199 (Ye et al. 2012). For the PCR amplification we ran real-time PCRs on a Biorad CFX96  
200 Thermocycler (BioRad, Hercules CA, USA) using the ABsolute SYBR Capillary Mix  
201 (Thermo Fisher, Waltham MA, USA) in a final volume of 20 µl, and the following cyclers  
202 programmes: 95°C for 15 min followed by 45 cycles of 95°C for 15 s, 55°C for 20 s and 72°  
203 C for 20 s for the FallCHS primer pair, and 95°C for 15 min followed by 45 cycles of 95°C  
204 for 15 s, 60°C for 15 s and 72°C for 10 s for the Serha199 primer pair. To calculate relative  
205 amounts of *S. herbamans* DNA, we used the  $2^{-\Delta\Delta Ct}$  method (Livak & Schmittgen, 2001)  
206 using the raw threshold cycle (Ct) values determined for the *S. herbamans*- and the  
207 *Reynoutria*-specific primer pairs.

208

### 209 *Statistical analyses*

210 To test for species differences in, and effects of environmental conditions on endophyte  
211 colonization, we analysed the relative *S. herbamans* densities, as determined by qPCR, with a  
212 linear model that included the effects of *Reynoutria* species, environmental treatment, and  
213 their interaction as fixed factors. We analysed knotweed responses to endophytes and  
214 environments with regard to three variables: aboveground biomass, leaf chlorophyll content,

215 and specific leaf area. For each response variable we fitted a linear mixed model with fungal  
216 inoculation, environmental treatments, knotweed species, and their interactions included as  
217 fixed factors, and clone identity included as random factor. To account for possible influences  
218 of initial size differences, we included the volume of the planted rhizome as a covariate in all  
219 three analyses. Prior to the analyses, the biomass and specific leaf area data were log-  
220 transformed to achieve homoscedasticity. All linear models were fitted with the *lmer* function  
221 in the *lme4* package (Bates et al., 2015) in R (R Core Team, 2018). We used the *effects* (Fox,  
222 2003) and *ggplot2* (Wickham, 2009) packages to visualize results.

223

## 224 **Results**

225 The experimental inoculation of knotweed plants with *Serendipita herbamans* was successful,  
226 but relative colonization rates were strongly environment-dependent (Fig. 1C; main effect of  
227 environmental treatment in the linear model:  $F = 27.12$ ,  $P < 0.001$ ). While there were hardly  
228 any fungi present in the non-inoculated samples, and the average relative colonization levels  
229 remained low in the inoculated control and drought treatments, colonization increased four-  
230 fold and eight-fold, respectively, under shaded and low nutrient conditions (Fig. 1C). There  
231 were no differences among the two *Reynoutria* species in terms of relative fungal colonisation  
232 ( $F < 1$  and  $P > 0.5$  for species main effect and species x treatment interaction). The  
233 colonization of *Reynoutria* roots by *S. herbamans* was confirmed by fluorescence  
234 microscopy. In all root samples from inoculated plants we detected hyphal structures typical  
235 for *S. herbamans* on root surfaces, between the outer cell layers, and inside of some cortical  
236 root cells (Fig. 1B). We also observed some hyphal structures in the roots of non-inoculated  
237 plants.

238 As expected, the stress treatments in our experiment strongly impacted the growth of  
239 knotweed (Table 1, Fig. 2). Compared to control plants, the biomass was reduced in all three

240 stress treatments, but particularly strongly under low-nutrient conditions. There were also  
241 strong treatment effects on chlorophyll content and SLA, with a particularly low chlorophyll  
242 content at low nutrient availability, and the highest SLA under shaded conditions (Fig. 2).  
243 There were also differences between the two knotweed taxa (Table 1). The hybrid *Reynoutria*  
244 *x bohemica* was generally larger (+ 25%) and had a higher SLA (+ 5%) than *R. japonica*, and  
245 its biomass was less sensitive to drought and shading than that of *R. japonica* (Fig. S1).

246 Inoculation with *Serendipita herbamans* influenced the growth of the knotweed plants,  
247 but again in a strongly treatment-dependent manner, with significant fungus by treatment  
248 interactions (but no fungus main effects) for aboveground biomass and chlorophyll content,  
249 and a marginally significant interaction for SLA (Table 1, Fig. 2). Under low-nutrient  
250 conditions, addition of the endophyte increased knotweed biomass by 15%, but decreased it  
251 by 10% in the shade, or had no effect at all under drought or control conditions. Similarly,  
252 endophyte inoculation increased chlorophyll content by 13% under low nutrients but  
253 decreased it by 5% under shaded conditions, and had no significant effects in the other two  
254 treatments. Finally, the SLA was positively affected in the shade but negatively under low-  
255 nutrient conditions, with no effects under drought or control conditions.

256

## 257 **Discussion**

258 Plant-microbe interactions play an important role in natural ecosystems (Bever et al., 2012;  
259 Klironomos, 2002; van der Putten et al., 2013). However, the ecological function of  
260 endophytic microbes that live within plants is so far little understood. In this study we show  
261 that the fungal root endophyte *Serendipita herbamans* can rapidly colonize invasive knotweed  
262 (*Reynoutria* ssp.) and influence its growth, with detrimental effects in the shade but  
263 promotion of growth under low-nutrient conditions. Our study thus demonstrates that this

264 widespread endophyte interacts with an important invasive plant, and it also highlights the  
265 environment-dependency of plant-endophyte interactions.

266

### 267 *Endophyte colonization*

268 Compared to previous studies on plant-Sebacinales interactions, our experiment had a rather  
269 realistic set-up, with fungi inoculated into a non-sterile natural soil that presumably already  
270 contained a microbial community. Microscopy and qPCR confirmed that our inoculations  
271 were successful and that *S. herbamans* was able to colonize knotweed plants, which confirms  
272 field observations in the Tübingen area where Sebacinales including *S. herbamans* are  
273 frequent endophytes of invasive knotweed populations (Table S1). This is not surprising,  
274 given the broad host range of *Serendipita herbamans*, and of Sebacinales in general, which  
275 also includes native Polygonaceae (Garnica et al., 2013; Riess et al., 2014). Although exotic  
276 species are known to lose specialised biotic interactions, they often interact with generalist  
277 enemies and mutualists in the introduced range (Mitchell & Power, 2003; Richardson et al.,  
278 2007; van Kleunen et al., 2018). However, so far we do not know how novel the interaction  
279 between knotweed and *S. herbamans* really is because there are no data on endophyte  
280 diversity from the native East Asian range.

281 We found that the relative colonization of knotweed plants by *S. herbamans* was  
282 generally much stronger under low-nutrients or shade conditions than under control or  
283 drought conditions. Thus, *Reynoutria* plants appear to actively regulate their interactions with  
284 *S. herbamans* in an environment-specific fashion. It is known that plants can control fungal  
285 colonization, e.g. through the production of defense compounds or secondary metabolites  
286 inhibiting microbial growth (Zipfel & Oldroyd, 2017), or by diverting more carbohydrates to  
287 fungal symbionts (Carbonnel & Gutjahr, 2014; Martin et al., 2017). This has also been shown  
288 for the closely related *S. indica* which interferes with the immune system of host plants

289 (Jacobs et al., 2011) and influences sugar concentrations in their roots (Opitz et al., 2021).  
290 The functional and adaptive explanation for this is usually that plant benefits from  
291 interactions with fungi are environment-dependent, and therefore plants stimulate or restrict  
292 fungal access depending on these benefits. For instance, mycorrhizal colonisation is often  
293 triggered by low-nutrient conditions (Bueno de Mesquita et al., 2018). We also found that  
294 relative fungal colonization was highest under low-nutrient conditions, which is in line with  
295 the idea that *S. herbamans* improves the nutrition of *Reynoutria* plants. It is less clear why  
296 relative colonization was also increased in shaded plants because these should have been  
297 mainly carbon-limited, and under such conditions plant-microbe interactions often turn  
298 parasitic, as has been shown e.g. for interactions with mycorrhiza or rhizobia (Ballhorn et al.,  
299 2016; Lau et al., 2012).

300 We also detected *S. herbamans* in some non-inoculated plants. The sources of this could  
301 be external, e.g. fungi spores present in the potting soil, or splash dispersal from adjacent pots.  
302 However, the most likely explanation seems that *S. herbamans* was already present in some of  
303 the planted rhizomes. We know that some invasive knotweed populations are naturally  
304 colonized by *S. herbamans*, and we therefore cannot rule out that some surface-sterilized  
305 rhizomes still harboured the fungus.

306

### 307 *Endophyte effects on plant growth*

308 The inoculated *S. herbamans* fungi not only successfully colonized the knotweed plants in our  
309 experiment, but they also significantly impacted their growth. The magnitude and direction of  
310 these effects were strongly environment-dependent. Under benign or drought conditions,  
311 endophyte effects on plants were small and non-significant, whereas under low-nutrient  
312 conditions inoculation had strong positive effects, and under shade conditions strong negative

313 effects on knotweed performance. Similar context-dependent effects of endophytes have been  
314 found in other study systems (Davitt et al., 2010; Laitinen et al., 2016; Shaffer et al., 2018).

315 Low-nutrient conditions greatly reduced knotweed biomass, and here relative *S.*  
316 *herbamans* colonization was strong and the fungus increased plant growth. This suggests an  
317 active promotion of endophyte access by the plants because the fungi improve plant nutrition  
318 under these conditions. The observed increase of leaf chlorophyll content, which strongly  
319 correlates with leaf nitrogen content (Evans, 1989), supports this idea. We know that *S.*  
320 *herbamans* improves plant growth under lab conditions (Riess et al., 2014), and that the  
321 closely related *Serendipita indica* can improve the nutrient acquisition and growth of many  
322 plant species (Achatz et al., 2010; Barazani et al., 2005; Giauque et al., 2019; Varma et al.,  
323 1999; Waller et al., 2005). Thus, it seems very likely that *S. herbamans* also improved the  
324 nutrition, and as a consequence biomass growth, of invasive knotweed in our experiment.

325 Under shade conditions, the effects of *S. herbamans* were reversed, and inoculation  
326 negatively affected knotweed biomass as well as leaf chlorophyll content, suggesting that  
327 under these conditions the fungus indeed turned parasitic and compromised plant nutrition.  
328 Similar shifts in the directions of plant-microbe interactions have been observed in other  
329 studies (Ballhorn et al., 2016; Lau et al., 2012), and the likely explanation is that the typical  
330 ‘trade logic’ of mutualistic plant-microbe interactions - microbes receive photosynthates in  
331 exchange for improved nutrient uptake - only works where soil nutrients are limiting, but  
332 under carbon-limited shade conditions, it does not.

333 In the control and drought treatments, colonization and growth effects of endophytes  
334 were very low, indicating that under these conditions the host plants limited fungi access,  
335 similar to what is known from plant-mycorrhiza interactions (Averill et al., 2019; Carbonnel  
336 & Gutjahr, 2014). For the drought treatment, with episodes of plant wilting, it is also possible  
337 that the spread of fungi was simply limited by the lack of moisture.

338 Our results that *S. herbamans* can promote or weaken knotweed growth depending on  
339 environmental context raises intriguing questions about the habitat preferences of invasive  
340 knotweeds. Across their invasive range in Europe and North America, the species mostly  
341 thrive in open and nutrient-rich habitats, and benefit in particular from fluctuating nutrient  
342 supply (Parepa, Fischer, et al., 2013), but they rarely spread under closed canopy (Beerling,  
343 1991; Pyšek et al., 2009). It is possible that interactions with *S. herbamans* or other microbes  
344 contribute to these habitat preferences, by facilitating nutrient uptake in open habitats but  
345 limiting knotweed under shaded conditions. Further research - in particular field experiments  
346 - is needed to test these hypotheses.

347

#### 348 *Conclusions*

349 Our study demonstrates that the common fungal endophyte *Serendipita herbamans* can  
350 rapidly colonize fine roots of invasive knotweed and influence its growth both positively or  
351 negatively, depending on the environmental context. As *S. herbamans* is present in at least  
352 some invasive knotweed populations, the fungus could play a role in the growth and success  
353 of knotweed in some invaded habitats. However, understanding the true significance of this  
354 plant-fungus interaction requires further data, because ecological communities are of course  
355 more complex than our experimental set-up. In its natural habitat, invasive knotweed also  
356 interacts with competitors, herbivores and other enemies and mutualists, and some of these  
357 might be interacting with *S. herbamans*, too. Thus, the next step should be multi-species  
358 experiments, in the field or using mesocosm approaches, that evaluate the impact of *S.*  
359 *herbamans* on knotweed and other plants in a community context.

360

#### 361 **Acknowledgments**

362 We thank Christiane Karasch-Wittmann, Sabine Silberhorn, Julia Rafalski, Mirjam Rieger,  
363 Mohamed Osman, and several student helpers for their assistance with the greenhouse  
364 experiment and/or molecular work. This project was supported by the German Research  
365 Foundation (DFG grant BO 3241/8-1 to OB), and by a scholarship of the China Scholarship  
366 Council (grant no. 201504910498) to Zhiyong Liao.

367

### 368 **Authors' contributions**

369 SG, MP and OB conceived and designed the experiment, SG, ZL and SH carried out the  
370 experiment, FW performed microscopy and qPCR analyses, MP and OB analyzed the data,  
371 SG, FW, MP and OB drafted the manuscript, and all authors contributed to its revision.

372

### 373 **Data availability**

374 All data from our experiment will be made available through Dryad. The sequencing data  
375 from the supplement are stored at GeneBank under MZ650923 - MZ651047.

376

### 377 **References**

- 378 Achatz, B., von Rüden, S., Andrade, D., Neumann, E., Pons-Kühnemann, J., Kogel, K.-H.,  
379 Franken, P., & Waller, F. (2010). Root colonization by *Piriformospora indica* enhances  
380 grain yield in barley under diverse nutrient regimes by accelerating plant development.  
381 *Plant and Soil*, 333(1), 59–70.
- 382 Afkhami, M. E., & Strauss, S. Y. (2016). Native fungal endophytes suppress an exotic  
383 dominant and increase plant diversity over small and large spatial scales. *Ecology*, 97(5),  
384 1159–1169.
- 385 Aguilar-Trigueros, C. A., & Rillig, M. C. (2016). Effect of different root endophytic fungi on  
386 plant community structure in experimental microcosms. *Ecology and Evolution*, 6(22),



- 387 8149–8158.
- 388 Aguilera, A. G., Alpert, P., Dukes, J. S., & Harrington, R. (2010). Impacts of the invasive  
389 plant *Fallopia japonica* (Houtt.) on plant communities and ecosystem processes.  
390 *Biological Invasions*, *12*(5), 1243–1252.
- 391 Aschehoug, E. T., Callaway, R. M., Newcombe, G., Tharayil, N., & Chen, S. (2014). Fungal  
392 endophyte increases the allelopathic effects of an invasive forb. *Oecologia*, *175*(1), 285–  
393 291.
- 394 Aschehoug, E. T., Metlen, K. L., Callaway, R. M., & Newcombe, G. (2012). Fungal  
395 endophytes directly increase the competitive effects of an invasive forb. *Ecology*, *93*(1),  
396 3–8.
- 397 Averill, C., Bhatnagar, J. M., Dietze, M. C., Pearse, W. D., & Kivlin, S. N. (2019). Global  
398 imprint of mycorrhizal fungi on whole-plant nutrient economics. *Proceedings of the*  
399 *National Academy of Sciences of the United States of America*, *116*(46), 23163–23168.
- 400 Ballhorn, D. J., Schädler, M., Elias, J. D., Millar, J. A., & Kautz, S. (2016). Friend or Foe-  
401 Light Availability Determines the Relationship between Mycorrhizal Fungi, Rhizobia  
402 and Lima Bean (*Phaseolus lunatus* L.). *PloS ONE*, *11*(5), e0154116.
- 403 Barazani, O., Benderoth, M., Groten, K., Kuhlemeier, C., & Baldwin, I. T. (2005).  
404 *Piriformospora indica* and *Sebacina vermifera* increase growth performance at the  
405 expense of herbivore resistance in *Nicotiana attenuata*. *Oecologia*, *146*(2), 234–243.
- 406 Bates, D., Mächler, M., Bolker, B., & Walker, S. (2015). Fitting linear mixed-effects models  
407 using lme4. *Journal of Statistical Software*, *67*(1), 1–48.
- 408 Beerling, D. J. (1991). The effect of Riparian land use on the occurrence and abundance of  
409 Japanese knotweed *Reynoutria japonica* on selected rivers in South Wales. *Biological*  
410 *Conservation*, *55*(3), 329–337.
- 411 Behie, S. W., & Bidochka, M. J. (2014). Nutrient transfer in plant-fungal symbioses. *Trends*

- 412           *in Plant Science*, 19(11), 734–740.
- 413   Bever, J. D., Platt, T. G., & Morton, E. R. (2012). Microbial population and community  
414           dynamics on plant roots and their feedbacks on plant communities. *Annual Review of*  
415           *Microbiology*, 66, 265–283.
- 416   Bueno de Mesquita, C. P., Sartwell, S. A., Ordemann, E. V., Porazinska, D. L., Farrer, E. C.,  
417           King, A. J., Spasojevic, M. J., Smith, J. G., Suding, K. N., & Schmidt, S. K. (2018).  
418           Patterns of root colonization by arbuscular mycorrhizal fungi and dark septate  
419           endophytes across a mostly-unvegetated, high-elevation landscape. *Fungal Ecology*, 36,  
420           63–74.
- 421   Callaway, R. M., Bedmar, E. J., Reinhart, K. O., Silvan, C. G., & Klironomos, J. (2011).  
422           Effects of soil biota from different ranges on Robinia invasion: acquiring mutualists and  
423           escaping pathogens. *Ecology*, 92(5), 1027–1035.
- 424   Callaway, R. M., Thelen, G. C., Rodriguez, A., & Holben, W. E. (2004). Soil biota and exotic  
425           plant invasion. *Nature*, 427(6976), 731–733.
- 426   Carbonnel, S., & Gutjahr, C. (2014). Control of arbuscular mycorrhiza development by  
427           nutrient signals. *Frontiers in Plant Science*, 5, 462.
- 428   Clay, K., & Holah, J. (1999). Fungal endophyte symbiosis and plant diversity in successional  
429           fields. *Science*, 285(5434), 1742–1745.
- 430   Clay, K., Shearin, Z. R. C., Bourke, K. A., Bickford, W. A., & Kowalski, K. P. (2016).  
431           Diversity of fungal endophytes in non-native *Phragmites australis* in the Great Lakes.  
432           *Biological Invasions*, 18(9), 2703–2716.
- 433   Cosme, M., Lu, J., Erb, M., Stout, M. J., Franken, P., & Wurst, S. (2016). A fungal endophyte  
434           helps plants to tolerate root herbivory through changes in gibberellin and jasmonate  
435           signaling. *New Phytologist*, 211(3), 1065–1076.
- 436   Davitt, A. J., Stansberry, M., & Rudgers, J. A. (2010). Do the costs and benefits of fungal

- 437 endophyte symbiosis vary with light availability? *New Phytologist*, 188(3), 824–834.
- 438 Dawson, W., & Schrama, M. (2016). Identifying the role of soil microbes in plant invasions.  
439 *Journal of Ecology*, 104(5), 1211–1218.
- 440 Deshmukh, S., Hüchelhoven, R., Schäfer, P., Imani, J., Sharma, M., Weiss, M., Waller, F., &  
441 Kogel, K.-H. (2006). The root endophytic fungus *Piriformospora indica* requires host  
442 cell death for proliferation during mutualistic symbiosis with barley. *Proceedings of the*  
443 *National Academy of Sciences of the United States of America*, 103(49), 18450–18457.
- 444 Evans, J. R. (1989). Photosynthesis and nitrogen relationships in leaves of C3 plants.  
445 *Oecologia*, 78(1), 9–19.
- 446 Fox, J. (2003). Effect displays in R for generalised linear models. *Journal of Statistical*  
447 *Software*, 8(15), 1–27.
- 448 Gamica, S., Riess, K., Bauer, R., Oberwinkler, F., & Weiß, M. (2013). Phylogenetic diversity  
449 and structure of sebacinoid fungi associated with plant communities along an altitudinal  
450 gradient. *FEMS Microbiology Ecology*, 83(2), 265–278.
- 451 Gamica, S., Riess, K., Schön, M. E., Oberwinkler, F., & Setaro, S. D. (2016). Divergence  
452 times and phylogenetic patterns of Sebaciniales, a highly diverse and widespread fungal  
453 lineage. *PLoS ONE*, 11(3), e0149531.
- 454 Gerber, E., Krebs, C., Murrell, C., Moretti, M., Rocklin, R., & Schaffner, U. (2008). Exotic  
455 invasive knotweeds (*Fallopia* spp.) negatively affect native plant and invertebrate  
456 assemblages in European riparian habitats. *Biological Conservation*, 141(3), 646–654.
- 457 Giauque, H., Connor, E. W., & Hawkes, C. V. (2019). Endophyte traits relevant to stress  
458 tolerance, resource use and habitat of origin predict effects on host plants. *New*  
459 *Phytologist*, 221(4), 2239–2249.
- 460 Gill, S. S., Gill, R., Trivedi, D. K., Anjum, N. A., Sharma, K. K., Ansari, M. W., Ansari, A.  
461 A., Johri, A. K., Prasad, R., Pereira, E., Varma, A., & Tuteja, N. (2016). *Piriformospora*

- 462 indica: potential and significance in plant stress tolerance. *Frontiers in Microbiology*, 7,  
463 332.
- 464 Hejda, M., Pyšek, P., & Jarošík, V. (2009). Impact of invasive plants on the species richness,  
465 diversity and composition of invaded communities. *Journal of Ecology*, 97(3), 393–403.
- 466 Huang, B., Lin, H., Yan, C., Qiu, H., Qiu, L., & Yu, R. (2014). Optimal inductive and cultural  
467 conditions of *Polygonum multiflorum* transgenic hairy roots mediated with  
468 *Agrobacterium rhizogenes* R1601 and an analysis of their anthraquinone constituents.  
469 *Pharmacognosy Magazine*, 10(37), 77–82.
- 470 Inderjit, & van der Putten, W. H. (2010). Impacts of soil microbial communities on exotic  
471 plant invasions. *Trends in Ecology & Evolution*, 25(9), 512–519.
- 472 Jacobs, S., Zechmann, B., Molitor, A., Trujillo, M., Petutschnig, E., Lipka, V., Kogel, K.-H.,  
473 & Schäfer, P. (2011). Broad-spectrum suppression of innate immunity is required for  
474 colonization of *Arabidopsis* roots by the fungus *Piriformospora indica*. *Plant Physiology*,  
475 156(2), 726–740.
- 476 Kivlin, S. N., Emery, S. M., & Rudgers, J. A. (2013). Fungal symbionts alter plant responses  
477 to global change. *American Journal of Botany*, 100(7), 1445–1457.
- 478 Klironomos, J. N. (2002). Feedback with soil biota contributes to plant rarity and invasiveness  
479 in communities. *Nature*, 417(6884), 67–70.
- 480 Krebs, C., Mahy, G., Matthies, D., Schaffner, U., Tiébré, M.-S., & Bizoux, J.-P. (2010). Taxa  
481 distribution and RAPD markers indicate different origin and regional differentiation of  
482 hybrids in the invasive *Fallopia* complex in central-western Europe. *Plant Biology*,  
483 12(1), 215–223.
- 484 Laitinen, R. K., Hellström, K. O., & Wäli, P. R. (2016). Context-dependent outcomes of  
485 subarctic grass-endophyte symbiosis. *Fungal Ecology*, 23, 66–74.
- 486 Lau, J. A., Bowling, E. J., Gentry, L. E., Glasser, P. A., Monarch, E. A., Olesen, W. M.,

- 487 Waxmonsky, J., & Young, R. T. (2012). Direct and interactive effects of light and  
488 nutrients on the legume-rhizobia mutualism. *Acta Oecologica*, 39, 80–86.
- 489 Livak, K. J., & Schmittgen, T. D. (2001). Analysis of relative gene expression data using real-  
490 time quantitative PCR and the  $2(-\Delta\Delta C(T))$  method. *Methods*, 25(4), 402–408.
- 491 Mangla, S., & Callaway, R. M. (2007). Exotic invasive plant accumulates native soil  
492 pathogens which inhibit native plants. *Journal of Ecology*, 0(0), 071031082432001 – ???
- 493 Maron, J. L., Klironomos, J., Waller, L., & Callaway, R. M. (2014). Invasive plants escape  
494 from suppressive soil biota at regional scales. *Journal of Ecology*, 102(1), 19–27.
- 495 Martin, F. M., Uroz, S., & Barker, D. G. (2017). Ancestral alliances: Plant mutualistic  
496 symbioses with fungi and bacteria. *Science*, 356(6340).  
497 <https://doi.org/10.1126/science.aad4501>
- 498 Mayerhofer, M. S., Kernaghan, G., & Harper, K. A. (2013). The effects of fungal root  
499 endophytes on plant growth: a meta-analysis. *Mycorrhiza*, 23(2), 119–128.
- 500 Meinhardt, K. A., & Gehring, C. A. (2012). Disrupting mycorrhizal mutualisms: a potential  
501 mechanism by which exotic tamarisk outcompetes native cottonwoods. *Ecological*  
502 *Applications: A Publication of the Ecological Society of America*, 22(2), 532–549.
- 503 Mitchell, C. E., & Power, A. G. (2003). Release of invasive plants from fungal and viral  
504 pathogens. *Nature*, 421(6923), 625–627.
- 505 Murrell, C., Gerber, E., Krebs, C., Parepa, M., Schaffner, U., & Bossdorf, O. (2011). Invasive  
506 knotweed affects native plants through allelopathy. *American Journal of Botany*, 98(1),  
507 38–43.
- 508 Oberhofer, M., Güsewell, S., & Leuchtman, A. (2014). Effects of natural hybrid and non-  
509 hybrid *Epichloë* endophytes on the response of *Hordelymus europaeus* to drought stress.  
510 *New Phytologist*, 201(1), 242–253.
- 511 Omacini, M., Chaneton, E. J., Ghersa, C. M., & Müller, C. B. (2001). Symbiotic fungal

- 512 endophytes control insect host-parasite interaction webs. *Nature*, 409(6816), 78–81.
- 513 Opitz, M. W., Daneshkhah, R., Lorenz, C., Ludwig, R., Steinkellner, S., & Wieczorek, K.  
514 (2021). Serendipita indica changes host sugar and defense status in Arabidopsis thaliana:  
515 cooperation or exploitation? *Planta*, 253(3), 74.
- 516 Parepa, M., Fischer, M., & Bossdorf, O. (2013). Environmental variability promotes plant  
517 invasion. *Nature Communications*, 4, 1604.
- 518 Parepa, M., Schaffner, U., & Bossdorf, O. (2013). Help from under ground: soil biota  
519 facilitate knotweed invasion. *Ecosphere*, 4(2), art31.
- 520 Pyšek, P., Jarošík, V., Pergl, J., Randall, R., Chytrý, M., Kühn, I., Tichý, L., Danihelka, J.,  
521 Chrtek jun, J., & Sádlo, J. (2009). The global invasion success of Central European  
522 plants is related to distribution characteristics in their native range and species traits.  
523 *Diversity & Distributions*, 15(5), 891–903.
- 524 R Core Team. (2018). *R: A language and environment for statistical computing*. R  
525 Foundation for Statistical Computing.
- 526 Reinhart, K. O., Packer, A., Van der Putten, W. H., & Clay, K. (2003). Plant-soil biota  
527 interactions and spatial distribution of black cherry in its native and invasive ranges.  
528 *Ecology Letters*, 6(12), 1046–1050.
- 529 Rho, H., Hsieh, M., Kandel, S. L., Cantillo, J., Doty, S. L., & Kim, S.-H. (2018). Do  
530 Endophytes Promote Growth of Host Plants Under Stress? A Meta-Analysis on Plant  
531 Stress Mitigation by Endophytes. *Microbial Ecology*, 75(2), 407–418.
- 532 Richardson, D. M., Allsopp, N., D'antonio, C. M., Milton, S. J., & Rejmánek, M. (2007).  
533 Plant invasions - the role of mutualisms. *Biological Reviews*, 75(1), 65–93.
- 534 Riess, K., Oberwinkler, F., Bauer, R., & Garnica, S. (2014). Communities of endophytic  
535 sebacinales associated with roots of herbaceous plants in agricultural and grassland  
536 ecosystems are dominated by Serendipita herbamans sp. nov. *PLoS ONE*, 9(4), e94676.

- 537 Rodriguez, R. J., Henson, J., Van Volkenburgh, E., Hoy, M., Wright, L., Beckwith, F., Kim,  
538 Y.-O., & Redman, R. S. (2008). Stress tolerance in plants via habitat-adapted symbiosis.  
539 *The ISME Journal*, 2(4), 404–416.
- 540 Rodriguez, R. J., White, J. F., Jr, Arnold, A. E., & Redman, R. S. (2009). Fungal endophytes:  
541 diversity and functional roles. *New Phytologist*, 182(2), 314–330.
- 542 Rudgers, J. A., Koslow, J. M., & Clay, K. (2004). Endophytic fungi alter relationships  
543 between diversity and ecosystem properties. *Ecology Letters*, 7(1), 42–51.
- 544 Rudgers, J. A., Mattingly, W. B., & Koslow, J. M. (2005). Mutualistic fungus promotes plant  
545 invasion into diverse communities. *Oecologia*, 144(3), 463–471.
- 546 Shaffer, J. P., Zalamea, P.-C., Sarmiento, C., Gallery, Rachel E., Dalling, J. W., Davis, A. S.,  
547 Baltrus, D. A., & Arnold, A. E. (2018). Context-dependent and variable effects of  
548 endohyphal bacteria on interactions between fungi and seeds. *Fungal Ecology*, 36, 117–  
549 127.
- 550 Shipunov, A., Newcombe, G., Raghavendra, A. K. H., & Anderson, C. L. (2008). Hidden  
551 diversity of endophytic fungi in an invasive plant. *American Journal of Botany*, 95(9),  
552 1096–1108.
- 553 Siemens, T. J., & Blossey, B. (2007). An evaluation of mechanisms preventing growth and  
554 survival of two native species in invasive Bohemian knotweed (*Fallopia x bohemica*,  
555 *Polygonaceae*). *American Journal of Botany*, 94(5), 776–783.
- 556 Stinson, K. A., Campbell, S. A., Powell, J. R., Wolfe, B. E., Callaway, R. M., Thelen, G. C.,  
557 Hallett, S. G., Prati, D., & Klironomos, J. N. (2006). Invasive plant suppresses the  
558 growth of native tree seedlings by disrupting belowground mutualisms. *PLoS Biology*,  
559 4(5), e140.
- 560 van der Putten, W. H., Bardgett, R. D., Bever, J. D., Bezemer, T. M., Casper, B. B., Fukami,  
561 T., Kardol, P., Klironomos, J. N., Kulmatiski, A., Schweitzer, J. A., Suding, K. N., Van

- 562 de Voorde, T. F. J., & Wardle, D. A. (2013). Plant-soil feedbacks: the past, the present  
563 and future challenges. *Journal of Ecology*, *101*(2), 265–276.
- 564 van Kleunen, M., Bossdorf, O., & Dawson, W. (2018). The Ecology and Evolution of Alien  
565 Plants. *Annual Review of Ecology, Evolution, and Systematics*, *49*(1), 25–47.
- 566 Varma, A., Savita, V., Sudha, Sahay, N., Butehorn, B., & Franken, P. (1999). Piriformospora  
567 indica, a cultivable plant-growth-promoting root endophyte. *Applied and Environmental*  
568 *Microbiology*, *65*(6), 2741–2744.
- 569 Waller, F., Achatz, B., Baltruschat, H., Fodor, J., Becker, K., Fischer, M., Heier, T.,  
570 Hückelhoven, R., Neumann, C., von Wettstein, D., Franken, P., & Kogel, K.-H. (2005).  
571 The endophytic fungus Piriformospora indica reprograms barley to salt-stress tolerance,  
572 disease resistance, and higher yield. *Proceedings of the National Academy of Sciences of*  
573 *the United States of America*, *102*(38), 13386–13391.
- 574 Weiss, M., Sýkorová, Z., Garnica, S., Riess, K., Martos, F., Krause, C., Oberwinkler, F.,  
575 Bauer, R., & Redecker, D. (2011). Sebacinales everywhere: previously overlooked  
576 ubiquitous fungal endophytes. *PLoS ONE*, *6*(2), e16793.
- 577 Wickham, H. (2009). *ggplot2: Elegant Graphics for Data Analysis*. Springer-Verlag.
- 578 Ye, J., Coulouris, G., Zaretskaya, I., Cutcutache, I., Rozen, S., & Madden, T. L. (2012)  
579 Primer-BLAST: a tool to design target-specific primers for polymerase chain reaction.  
580 *BMC Bioinformatics*, *13*, 134.
- 581 Zipfel, C., & Oldroyd, G. E. D. (2017). Plant signalling in symbiosis and immunity. *Nature*,  
582 *543*(7645), 328–336.



**Table 1.** Analysis of variance testing the effects of inoculation with *Serendipita herbamans*, stress treatment and knotweed species (*Reynoutria japonica* or *R. × bohemica*), and their interactions, on the performance of invasive knotweed. Each linear mixed model additionally included the volume of the planted rhizome as a covariate, as well as knotweed clone identity as a random variable. Significant *P*-values are in bold.

|                              | df | Aboveground biomass |                  | Chlorophyll content |                  | Specific leaf area |                  |
|------------------------------|----|---------------------|------------------|---------------------|------------------|--------------------|------------------|
|                              |    | <i>F</i> -ratio     | <i>P</i> -value  | <i>F</i> -ratio     | <i>P</i> -value  | <i>F</i> -ratio    | <i>P</i> -value  |
| Rhizome volume               | 1  | 12.65               | <b>&lt;0.001</b> | 4.32                | <b>0.038</b>     | 0.51               | 0.474            |
| Fungus                       | 1  | 2.11                | 0.146            | 0.19                | 0.661            | 0.01               | 0.933            |
| Treatment                    | 3  | 2111.23             | <b>&lt;0.001</b> | 382.03              | <b>&lt;0.001</b> | 894.68             | <b>&lt;0.001</b> |
| Species                      | 1  | 13.44               | <b>0.001</b>     | 3.02                | 0.089            | 7.51               | <b>0.009</b>     |
| Fungus x Treatment           | 3  | 2.65                | <b>0.049</b>     | 6.56                | <b>&lt;0.001</b> | 2.20               | 0.088            |
| Fungus x Species             | 1  | 0.24                | 0.624            | 0.56                | 0.454            | 0.72               | 0.397            |
| Treatment x Species          | 3  | 3.83                | <b>0.010</b>     | 7.81                | 0.525            | 1.33               | 0.265            |
| Fungus x Treatment x Species | 3  | 0.31                | 0.817            | 1.16                | 0.324            | 0.29               | 0.829            |
| # Observations               |    | 283                 |                  | 283                 |                  | 281                |                  |

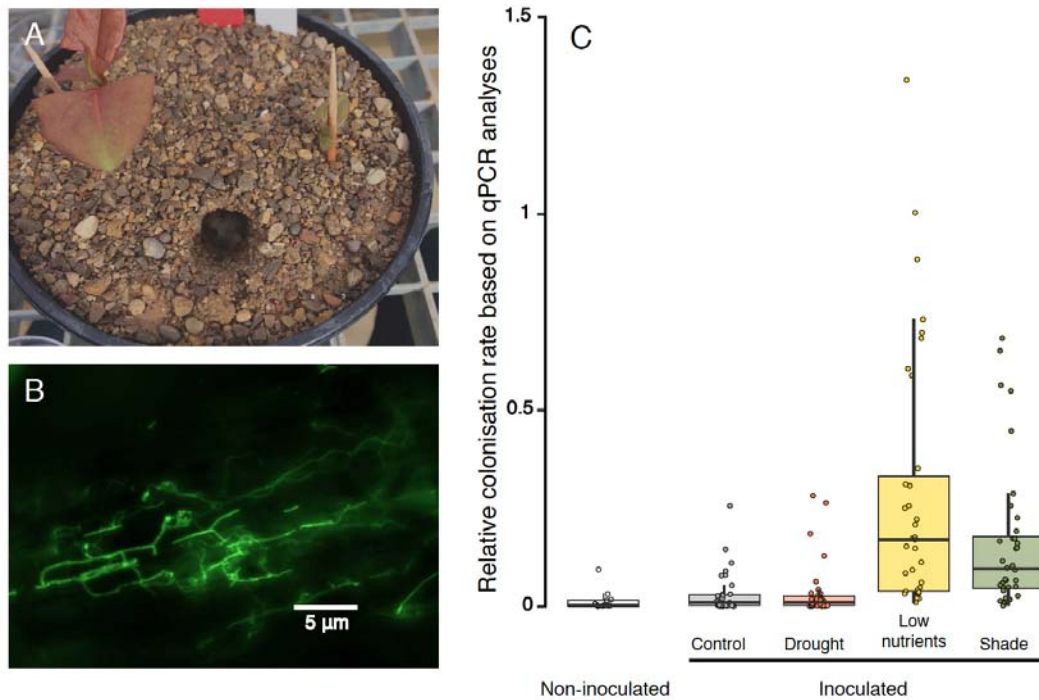

**Figure 1.** Experimental inoculation of *Reynoutria* plants with *Serendipita herbamans*, and the resulting fungal colonization. (A) An experimental pot right after inoculation, with freshly regenerated knotweed and the pit through which *S. herbamans* mycelium was added. (B) Fluorescence microscopic image of a root section of an inoculated *Reynoutria* plant, stained with WGA-AF 488. (C) Relative colonization rates of *S. herbamans* in the different experimental treatments, based on qPCR analyses. Points = individual observations; boxes = 25th - 75th percentiles; thick horizontal lines = medians; whiskers = 10th - 90th percentiles.

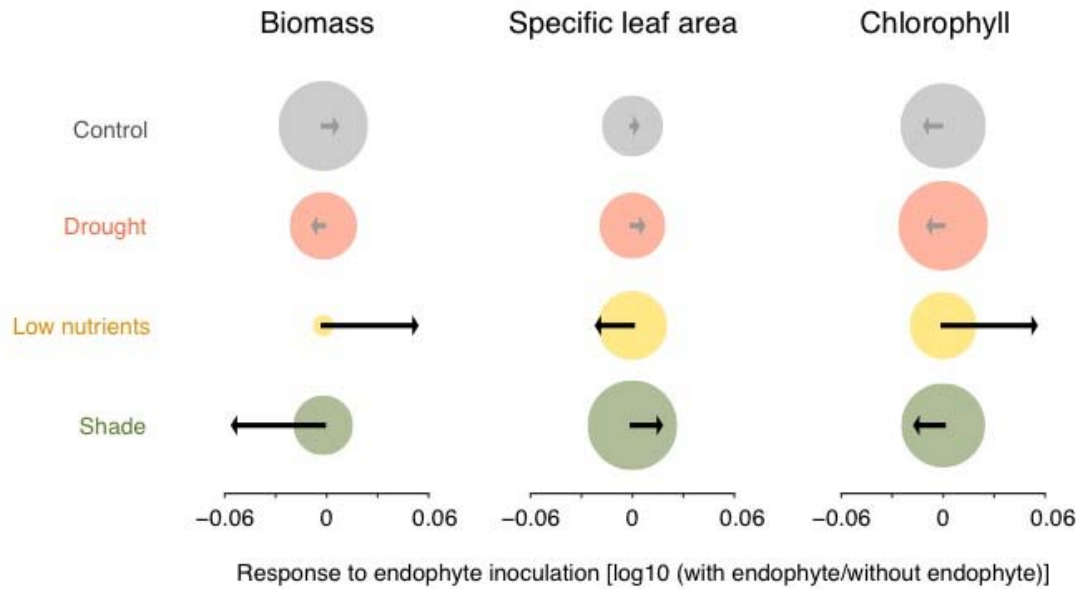

**Figure 2.** Effects of inoculation with *Serendipita herbamans* on invasive knotweed aboveground biomass, leaf chlorophyll content, and specific leaf area under different types of stress and in control conditions. The disc areas are proportional to the estimated means without endophyte inoculation, and the arrows show the log-responses of plants to endophyte inoculation in each treatment. Black arrows represent significant endophyte effects within a particular treatment, as indicated by Tukey's HSD test, grey arrows are non-significant.
